# Supplementary material for: Schiff base particles with aggregation-induced enhanced emission: random aggregation preventing π–π stacking
Source: Royal Society of Chemistry journal article supplement (doi:10.1039/c3tc31626b), 2013-01-01

## Supplementary material

### **Schiff Bases Particles with Aggregation-Induced Enhanced Emission: Random Aggregation Preventing - Stacking**

Lianke Wang, Zheng Zheng, Zhipeng Yu, Jun Zheng, Min Fang, Jieying Wu, Yupeng Tian and Hongping Zhou,\*

*College of Chemistry and Chemical Engineering, Anhui University and Key Laboratory of Functional Inorganic Materials Chemistry of Anhui Province, Hefei 230601, P. R. China*

*\*Corresponding author. Fax: +86-551-5107304; Tel: +86-551-5108151*

*E-mail address: [zhpzhp@263.net](mailto:zhpzhp@263.net).*

## Table of Contents

|                                                                                                                                                                                                                                                                                                                                                                                                                                                                                                                |    |
|----------------------------------------------------------------------------------------------------------------------------------------------------------------------------------------------------------------------------------------------------------------------------------------------------------------------------------------------------------------------------------------------------------------------------------------------------------------------------------------------------------------|----|
| <b>Table S1.</b> Relevant Spectroscopic Data of the Schiff Bases in Different Solvents .....                                                                                                                                                                                                                                                                                                                                                                                                                   | 3  |
| <b>Figure S1.</b> The UV-Vis absorption spectrum (left) and fluorescence emission spectrum (right) of <b>L1</b> in different solvents using $\lambda_2$ as the excitation wavelength.....                                                                                                                                                                                                                                                                                                                      | 3  |
| <b>Figure S2.</b> The UV-Vis absorption spectrum (left) and fluorescence emission spectrum (right) of <b>L2</b> in different solvents using $\lambda_2$ as the excitation wavelength.....                                                                                                                                                                                                                                                                                                                      | 4  |
| <b>Figure S3.</b> The UV-Vis absorption spectrum (left) and fluorescence emission spectrum (right) of <b>L3</b> in different solvents using $\lambda_2$ as the excitation wavelength.....                                                                                                                                                                                                                                                                                                                      | 4  |
| <b>Figure S4.</b> The absorption (a) (c) and emission (b) (d) spectra of <b>L1</b> and <b>L2</b> in THF/H <sub>2</sub> O mixtures with different water fractions ( $f_w$ ), respectively. The inset depicts the changes of PL peak intensity with different water fractions and the photos taken under UV light of <b>L1</b> and <b>L2</b> in the THF/water mixtures. (e) (f) and (g) depict the changes of PL intensity of <b>L1</b> , <b>L2</b> and <b>L3</b> with different water fractions, respectively.. | 5  |
| <b>Figure S5.</b> DSC thermograms of <b>L1</b> , <b>L2</b> and <b>L3</b> , heating rate: 20 °C /min, atmosphere: N <sub>2</sub> .....                                                                                                                                                                                                                                                                                                                                                                          | 5  |
| <b>Figure S6.</b> TGA thermograms of <b>L1</b> , <b>L2</b> and <b>L3</b> , recorded after pre-warming at 120 °C for 10 min under nitrogen at a heating rate of 20 °C /min.....                                                                                                                                                                                                                                                                                                                                 | 6  |
| <b>Figure S7.</b> The fluorescence spectroscopy of <b>L1</b> and <b>L2</b> in the pure solvents, the mixed solution with $f_w = 95\%$ , the film, the powder. ....                                                                                                                                                                                                                                                                                                                                             | 6  |
| <b>Figure S8.</b> The absorption spectra of <b>L1</b> , <b>L2</b> and <b>L3</b> in the pure solvention, the mixed solution with $f_w = 95\%$ , the film, the powder.....                                                                                                                                                                                                                                                                                                                                       | 6  |
| <b>Table S2.</b> The average diameter of aggregates with different $f_w$ of <b>L1-L3</b> ..                                                                                                                                                                                                                                                                                                                                                                                                                    | 7  |
| <b>Figure S9.</b> Particle size distributions of <b>L1</b> in THF/water mixtures with water fractions of (a) 50%, (b) 70%, (c) 90% and (d) 95%..                                                                                                                                                                                                                                                                                                                                                               | 7  |
| <b>Figure S10.</b> Particle size distributions of <b>L2</b> in THF/water mixtures with water fractions of (a) 50%, (b) 70%, (c) 90% and (d) 95%..                                                                                                                                                                                                                                                                                                                                                              | 8  |
| <b>Figure S11.</b> Particle size distributions of <b>L3</b> in THF/water mixtures with water fractions of (a) 60%, (b) 70%, (c) 90% and (d) 95%..                                                                                                                                                                                                                                                                                                                                                              | 8  |
| <b>Figure S12.</b> TEM images of amorphous-like aggregates of <b>L1</b> , <b>L2</b> and <b>L3</b> formed in THF/water mixtures with $f_w = 95\%$ .....                                                                                                                                                                                                                                                                                                                                                         | 8  |
| <b>Figure S13.</b> XRD patterns of <b>L1</b> , <b>L2</b> and <b>L3</b> solids.....                                                                                                                                                                                                                                                                                                                                                                                                                             | 9  |
| <b>Table S3.</b> Crystallographic Data for <b>L3</b> .....                                                                                                                                                                                                                                                                                                                                                                                                                                                     | 9  |
| <b>Figure S14.</b> <sup>1</sup> H NMR spectrum of <b>L1</b> .....                                                                                                                                                                                                                                                                                                                                                                                                                                              | 10 |
| <b>Figure S15.</b> <sup>13</sup> C NMR spectrum of <b>L1</b> .....                                                                                                                                                                                                                                                                                                                                                                                                                                             | 10 |
| <b>Figure S16.</b> MS spectrum of <b>L1</b> .....                                                                                                                                                                                                                                                                                                                                                                                                                                                              | 11 |
| <b>Figure S17.</b> <sup>1</sup> H NMR spectrum of <b>L2</b> .....                                                                                                                                                                                                                                                                                                                                                                                                                                              | 11 |
| <b>Figure S18.</b> <sup>13</sup> C NMR spectrum of <b>L2</b> .....                                                                                                                                                                                                                                                                                                                                                                                                                                             | 12 |
| <b>Figure S19.</b> MS spectrum of <b>L2</b> .....                                                                                                                                                                                                                                                                                                                                                                                                                                                              | 12 |
| <b>Figure S20.</b> <sup>1</sup> H NMR spectrum of <b>L3</b> .....                                                                                                                                                                                                                                                                                                                                                                                                                                              | 13 |
| <b>Figure S21.</b> <sup>13</sup> C NMR spectrum of <b>L3</b> .....                                                                                                                                                                                                                                                                                                                                                                                                                                             | 13 |
| <b>Figure S22.</b> MS spectrum of <b>L3</b> .....                                                                                                                                                                                                                                                                                                                                                                                                                                                              | 14 |

**Table S1.** Relevant Spectroscopic Data of the Schiff Bases in Different Solvents.

| Compounds | solvent                         | $\lambda_2^a$ | $\epsilon^b$ | $\lambda_{em}^c$ | $ST^d$   | $I^a$ | $\epsilon^b$ |
|-----------|---------------------------------|---------------|--------------|------------------|----------|-------|--------------|
| <b>L1</b> | benzene                         | 339.0         | 2.647        | 379.4            | 3141.119 | 302.5 | 2.762        |
|           | CH <sub>2</sub> Cl <sub>2</sub> | 338.0         | 2.609        | 380.2            | 3283.852 | 302.0 | 2.656        |
|           | THF                             | 338.5         | 3.0945       | 378.6            | 3128.997 | 302.5 | 2.901        |
|           | ethyl acetate                   | 337.5         | 2.903        | 378.4            | 3202.568 | 300.5 | 2.984        |
|           | acetonitrile                    | 337.0         | 2.890        | 381.8            | 3481.867 | 300.5 | 2.895        |
|           | DMF                             | 337.5         | 2.909        | 389.4            | 3949.095 | 302.0 | 2.724        |
| <b>L2</b> | benzene                         | 340.0         | 2.617        | 377.6            | 2928.714 | 303.0 | 2.248        |
|           | CH <sub>2</sub> Cl <sub>2</sub> | 336.0         | 2.700        | 378.4            | 3334.843 | 301.5 | 2.819        |
|           | THF                             | 338.0         | 2.754        | 381.4            | 3366.606 | 302.5 | 2.749        |
|           | ethyl acetate                   | 336.0         | 2.612        | 378.0            | 3306.878 | 301.0 | 2.673        |
|           | acetonitrile                    | 336.5         | 2.688        | 379.8            | 3388.035 | 300.0 | 2.712        |
|           | DMF                             | 337.0         | 2.595        | 387.6            | 3873.797 | 303.0 | 2.517        |
| <b>L3</b> | benzene                         | 342.5         | 2.233        | 379.0            | 2811.856 | 303.0 | 2.435        |
|           | CH <sub>2</sub> Cl <sub>2</sub> | 341.5         | 2.532        | 381.0            | 3035.858 | 301.5 | 2.778        |
|           | THF                             | 340.5         | 2.696        | 381.8            | 3176.852 | 301.0 | 2.892        |
|           | ethyl acetate                   | 338.5         | 2.536        | 379.2            | 3170.789 | 300.0 | 2.801        |
|           | acetonitrile                    | 336.0         | 2.586        | 381.4            | 3542.712 | 299.0 | 2.820        |
|           | DMF                             | 339.0         | 2.866        | 389.0            | 3791.584 | 301.5 | 3.184        |

<sup>a</sup> Absorption peak position in nm ( $1 \times 10^{-5} \text{ mol L}^{-1}$ ). <sup>b</sup> Maximum molar absorbance in  $10^4 \text{ mol}^{-1} \text{ L cm}^{-1}$ . <sup>c</sup> Peak position of SPEF in nm ( $1.0 \times 10^{-5} \text{ mol L}^{-1}$ ), excited at the absorption maximum. <sup>d</sup> Stokes shift in nm.

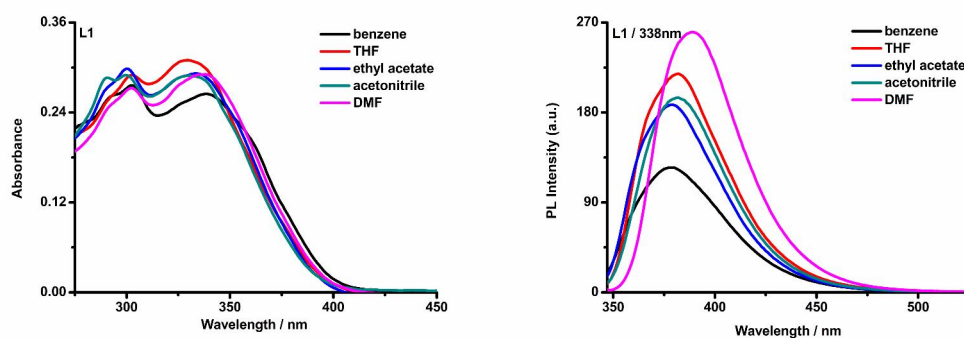

**Figure S1.** The UV-Vis absorption spectrum (left) and fluorescence emission spectrum (right) of **L1** in different solvents using  $\lambda_2$  as the excitation wavelength.

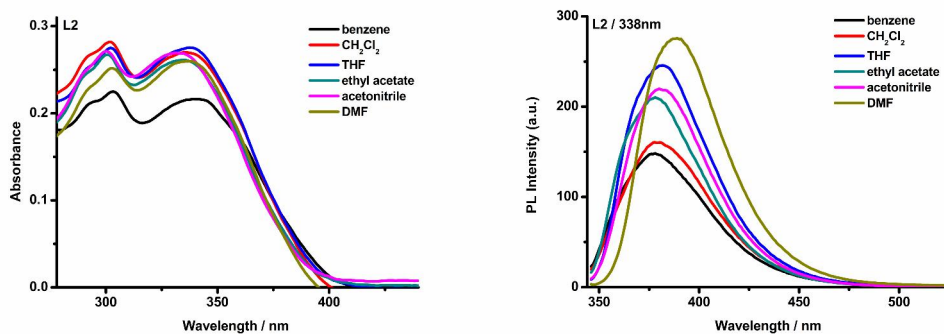

**Figure S2.** The UV-Vis absorption spectrum (left) and fluorescence emission spectrum (right) of **L2** in different solvents using 338 nm as the excitation wavelength.

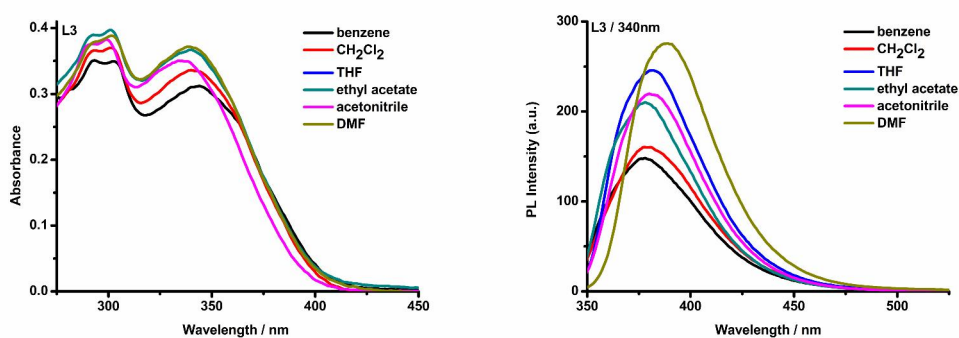

**Figure S3.** The UV-Vis absorption spectrum (left) and fluorescence emission spectrum (right) of **L3** in different solvents using 340 nm as the excitation wavelength.

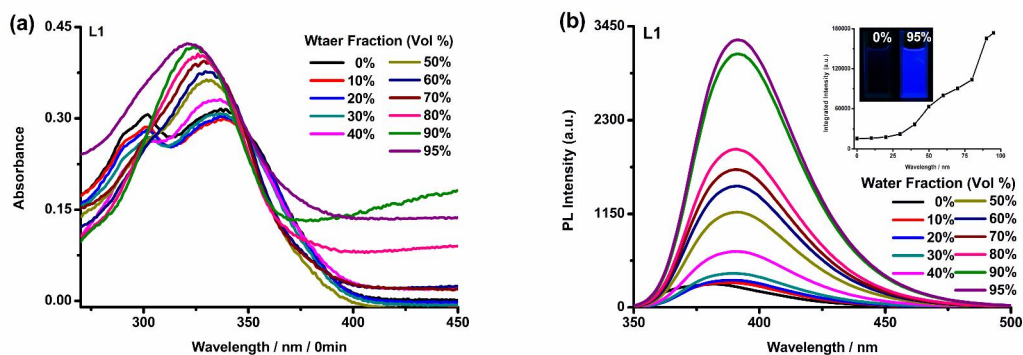

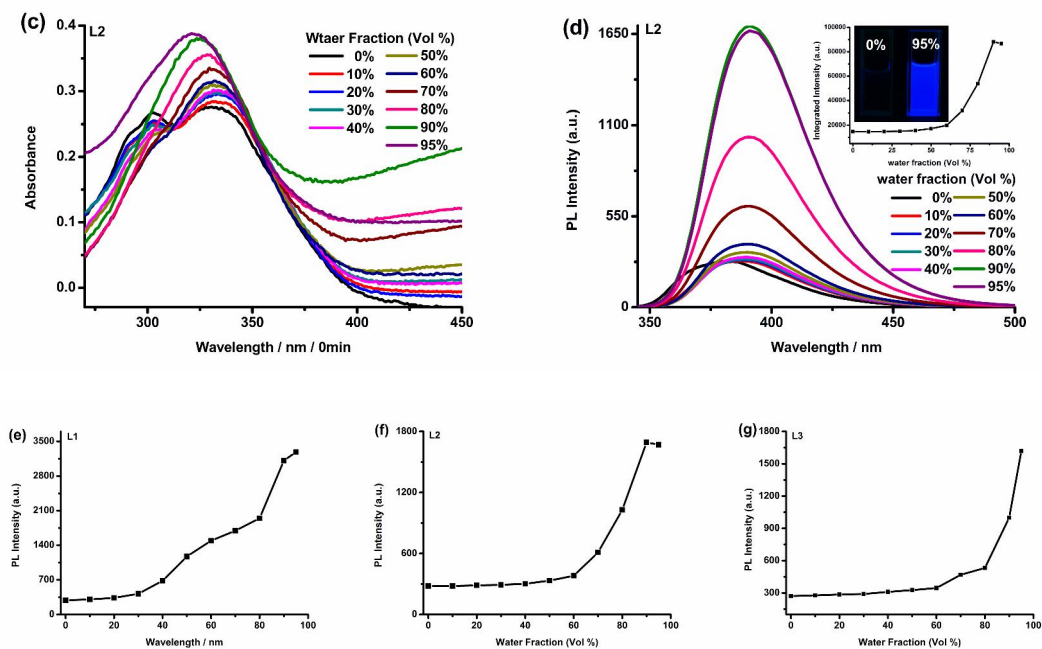

**Figure S4.** The absorption (a) (c) and emission (b) (d) spectra of L1 and L2 in THF/H<sub>2</sub>O mixtures with different water fractions ( $f_w$ ), respectively. The inset depicts the changes of integrated intensity with different water fractions and the photos taken under UV light of L1 and L2 in the THF/water mixtures. (e) (f) and (g) depict the changes of PL intensity of L1, L2 and L3 with different water fractions, respectively.

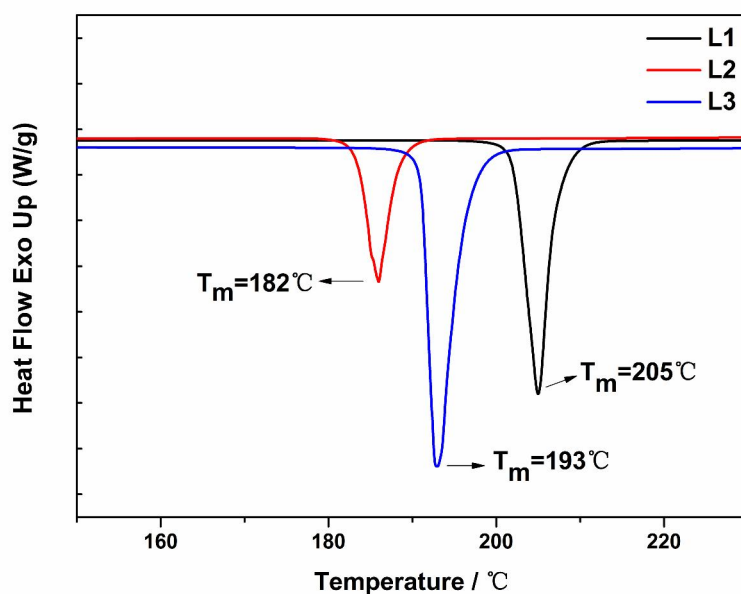

**Figure S5.** DSC thermograms of L1, L2 and L3, heating rate: 20 °C /min, atmosphere: N<sub>2</sub>.

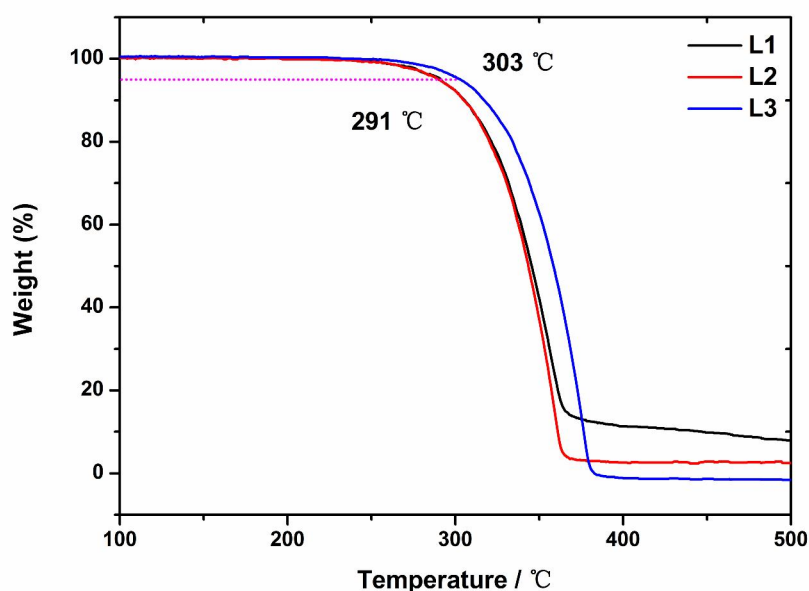

**Figure S6.** TGA thermograms of **L1**, **L2** and **L3**, recorded after pre-warming at 120 °C for 10 min under nitrogen at a heating rate of 20 °C /min.

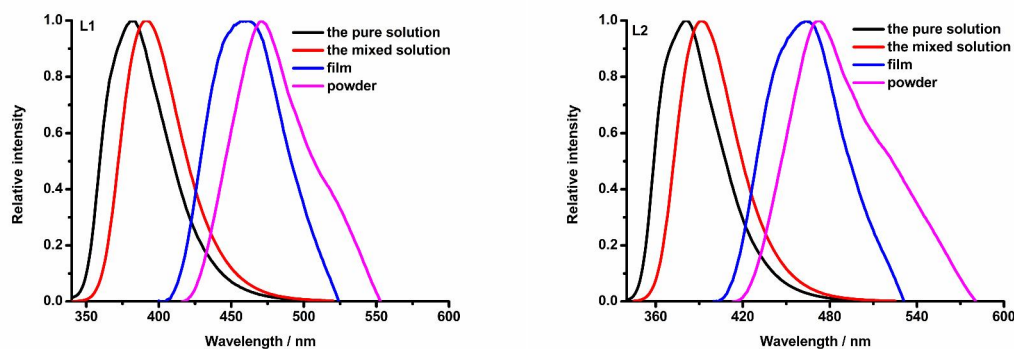

**Figure S7.** The fluorescent spectroscopy of **L1** and **L2** in the pure solvents, the mixed solution with  $f_w = 95\%$ , the film, the powder.

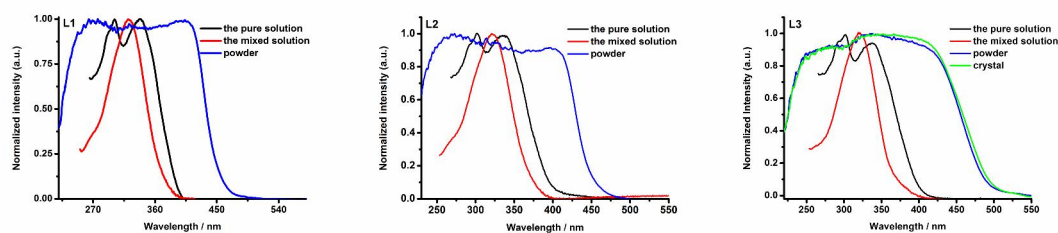

**Figure S8.** The absorption spectra of **L1**, **L2** and **L3** in the pure solvent, the mixed solution with  $f_w = 95\%$ , the film, the powder.

**Table S2.** The average diameter of aggregates with different  $f_w$  of **L1-L3**.

| <b>L1</b>             |        | <b>L2</b>             |       | <b>L3</b>             |        |
|-----------------------|--------|-----------------------|-------|-----------------------|--------|
| $d_{f_w=50\%}$ ( nm ) | 1696.7 | $d_{f_w=50\%}$ ( nm ) | 1499  | $d_{f_w=60\%}$ ( nm ) | 1015.1 |
| $d_{f_w=70\%}$ ( nm ) | 731.1  | $d_{f_w=70\%}$ ( nm ) | 557   | $d_{f_w=70\%}$ ( nm ) | 569.5  |
| $d_{f_w=90\%}$ ( nm ) | 353.6  | $d_{f_w=90\%}$ ( nm ) | 301.2 | $d_{f_w=90\%}$ ( nm ) | 310.9  |
| $d_{f_w=95\%}$ ( nm ) | 288.3  | $d_{f_w=95\%}$ ( nm ) | 255.4 | $d_{f_w=95\%}$ ( nm ) | 249.8  |

$d$  = average diameter of aggregates with different water fraction.

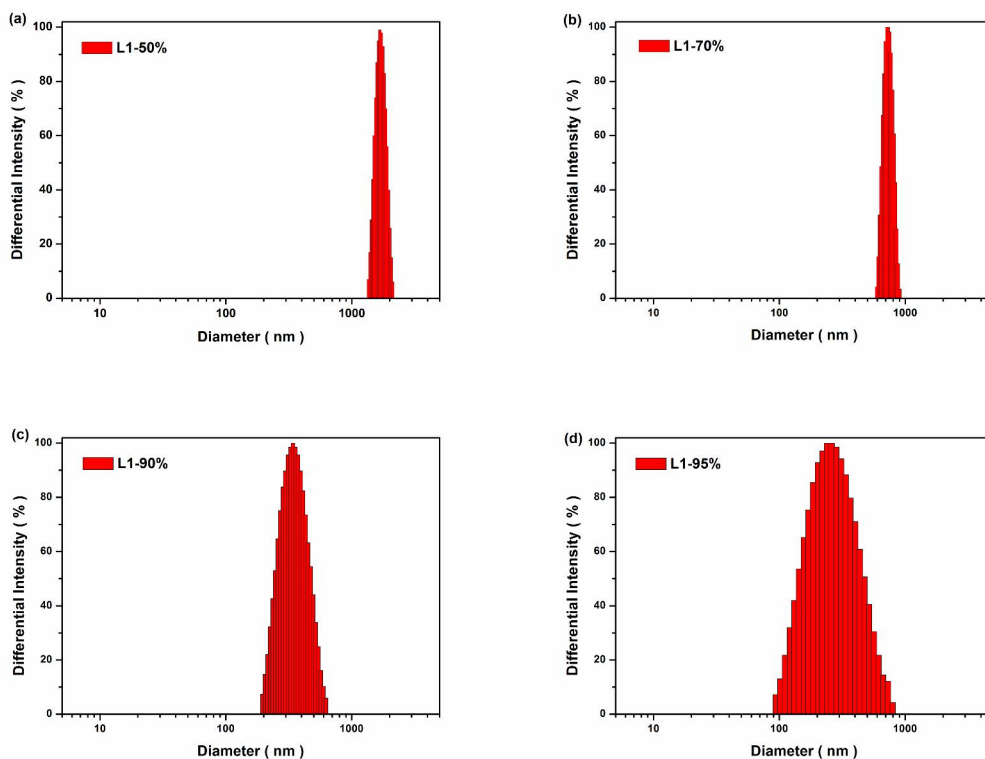

**Figure S9.** Particle size distributions of **L1** in THF/water mixtures with water fractions of (a) 50%, (b) 70%, (c) 90% and (d) 95%.

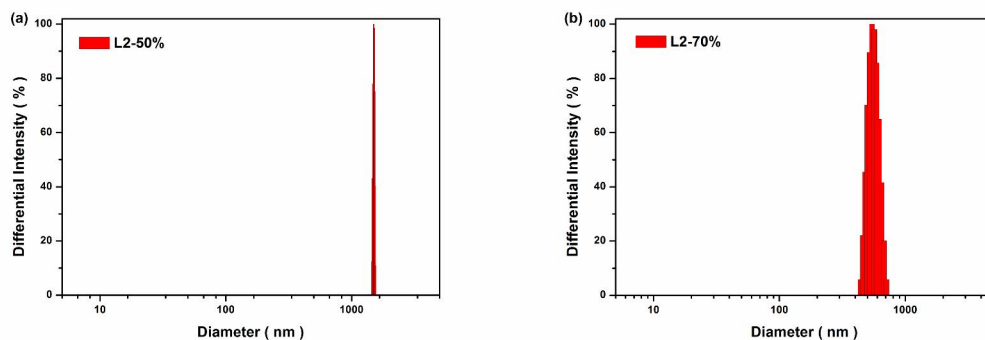

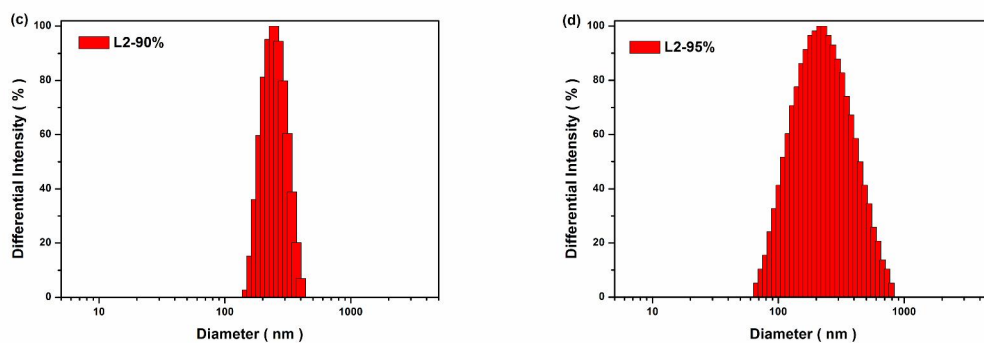

**Figure S10.** Particle size distributions of **L2** in THF/water mixtures with water fractions of (a) 50%, (b) 70%, (c) 90% and (d) 95%.

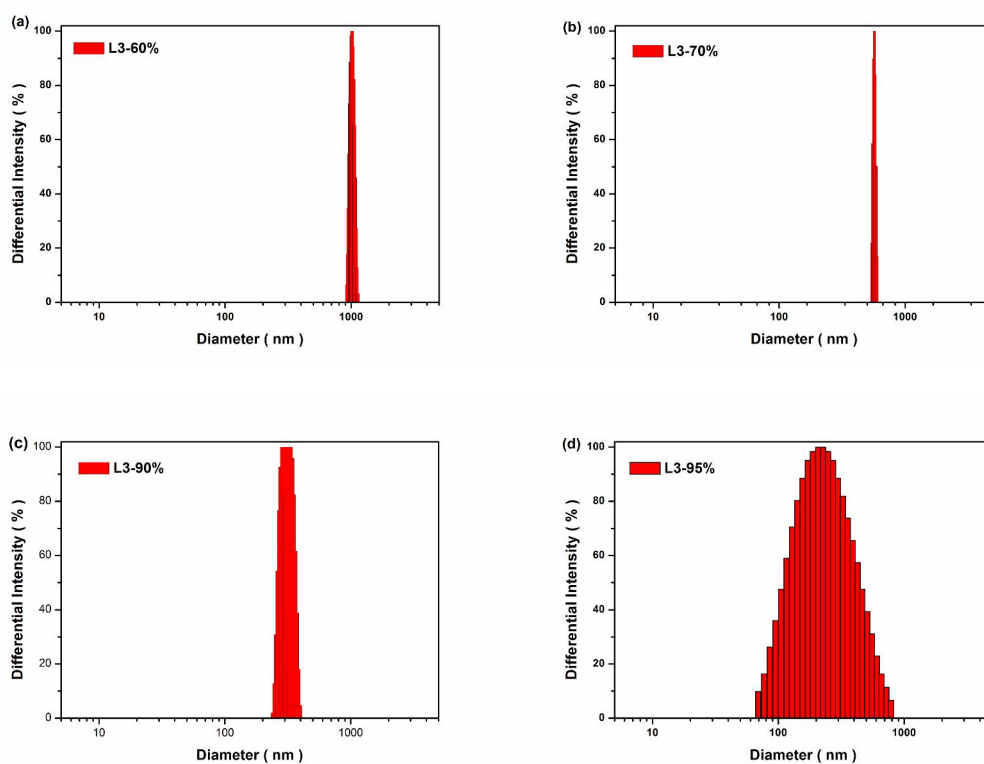

**Figure S11.** Particle size distributions of **L3** in THF/water mixtures with water fractions of (a) 60%, (b) 70%, (c) 90% and (d) 95%.

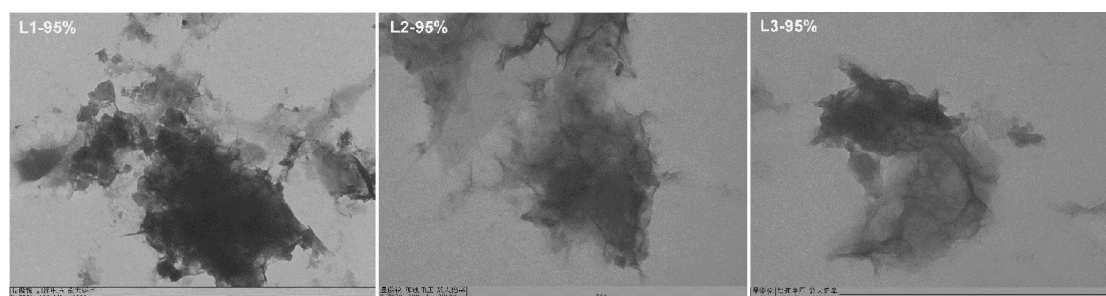

**Figure S12.** TEM images of amorphous-like aggregates of **L1**, **L2** and **L3** formed in



THF/water mixtures with  $f_w = 95\%$ .

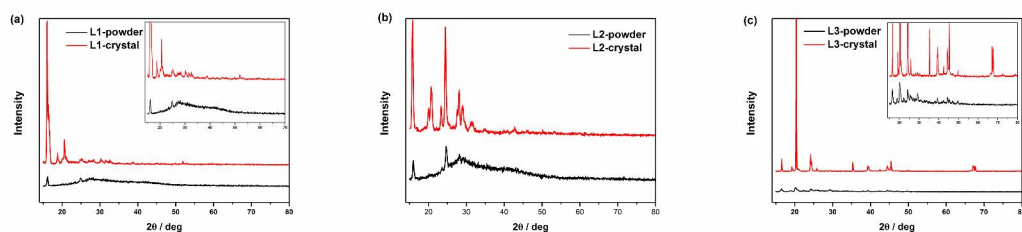

**Figure S13.** XRD patterns of **L1**, **L2** and **L3** solids.

**Table S3.** Crystallographic Data for **L3**.

| compound                                   | <b>L3</b>          |
|--------------------------------------------|--------------------|
| empirical formula                          | $C_{19}H_{13}N_3O$ |
| formula weight                             | 299.32             |
| crystal system                             | Orthorhombic       |
| space group                                | <i>Pbca</i>        |
| $a$ [Å]                                    | 10.969(5)          |
| $b$ [Å]                                    | 7.342(5)           |
| $c$ [Å]                                    | 36.533(5)          |
| [°]                                        | 90.000(5)          |
| [°]                                        | 90.000(5)          |
| [°]                                        | 90.000(5)          |
| $V$ [Å <sup>3</sup> ]                      | 2942(2)            |
| $Z$                                        | 8                  |
| $T$ [K]                                    | 298(2)             |
| $D_{\text{calcd}}$ [g · cm <sup>-3</sup> ] | 1.351              |
| $\mu$ [mm <sup>-1</sup> ]                  | 0.086              |
| range [°]                                  | 1.11-24.99         |
| total no. data                             | 19174              |
| no. unique data                            | 2592               |
| no. params refined                         | 208                |
| $R_1$                                      | 0.0378             |
| $wR_2$                                     | 0.1133             |
| GOF                                        | 1.115              |

**Figure S14.**  $^1\text{H}$  NMR spectrum of **L1**.

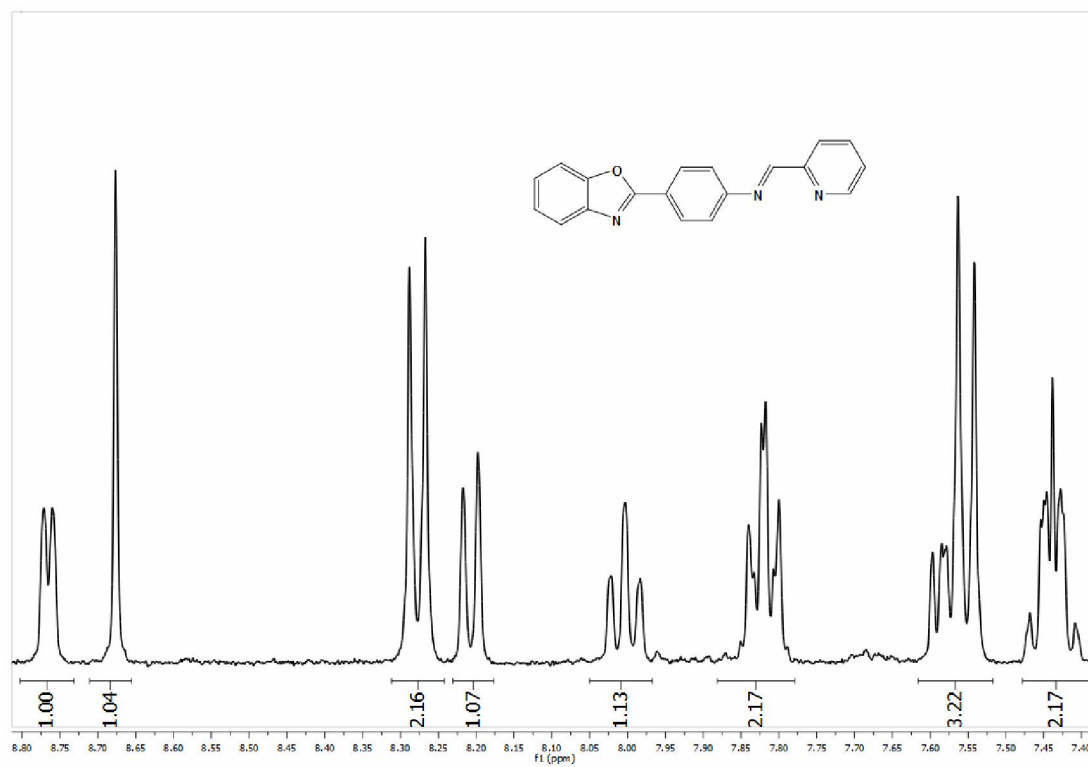

**Figure S15.**  $^{13}\text{C}$  NMR spectrum of **L1**.

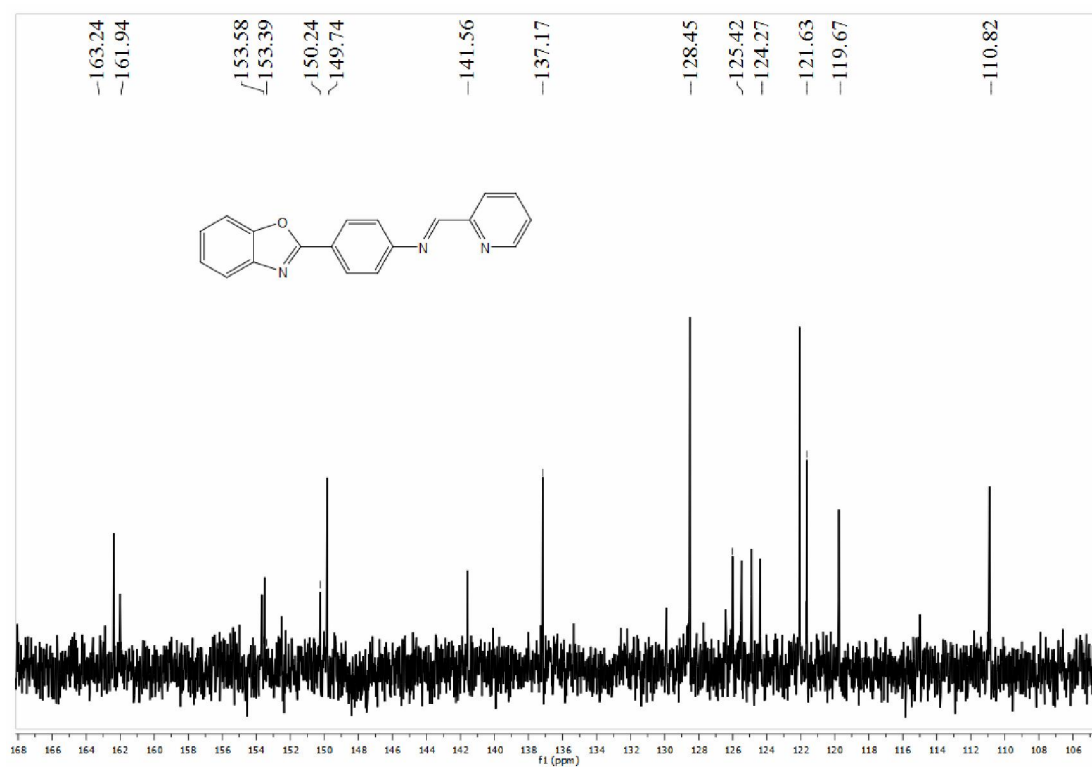

**Figure S16.** MS spectrum of **L1**.

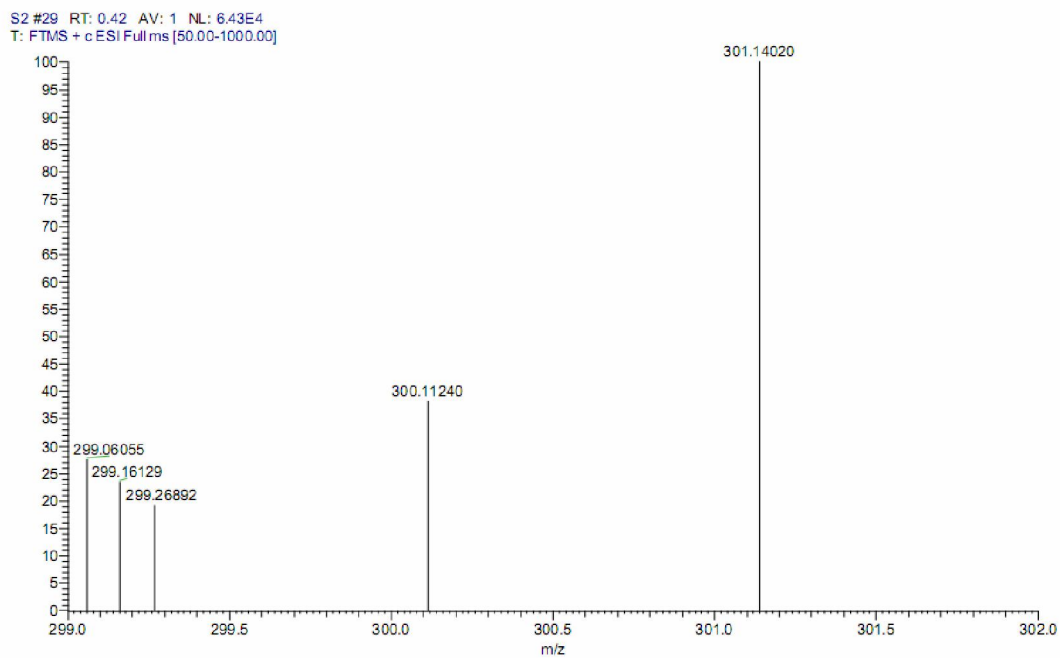

**Figure S17.**  $^1\text{H}$  NMR spectrum of **L2**.

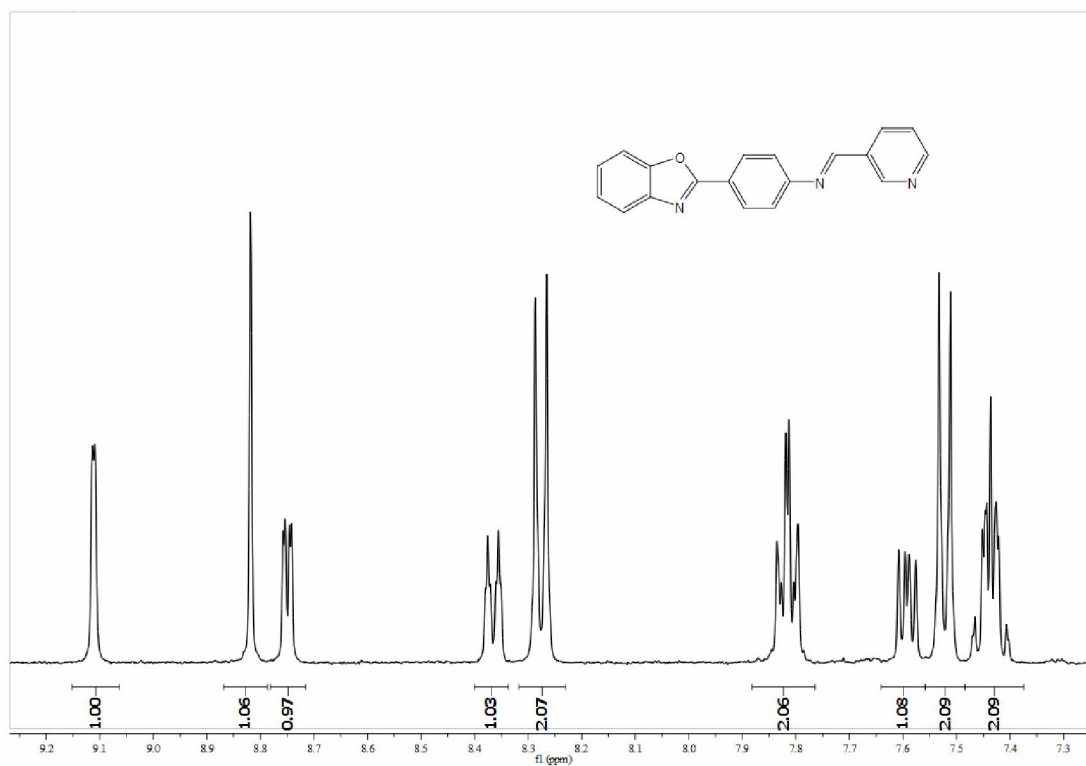

**Figure S18.**  $^{13}\text{C}$  NMR spectrum of **L2**.

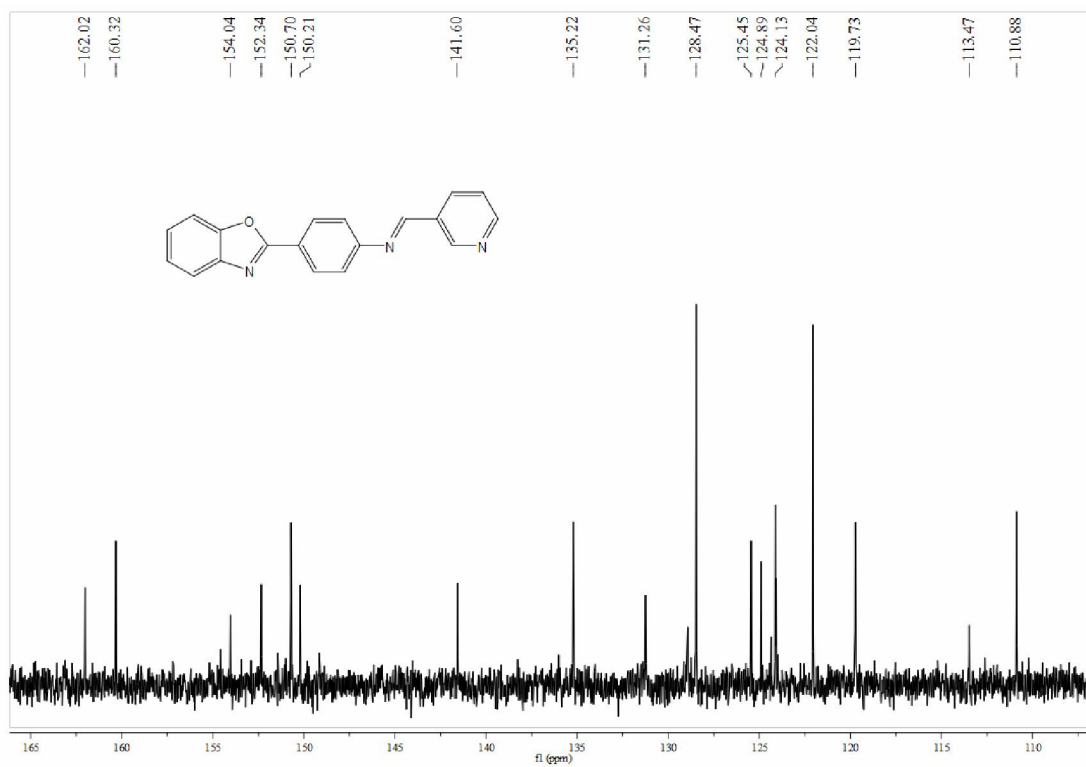

**Figure S19.** MS spectrum of **L2**.

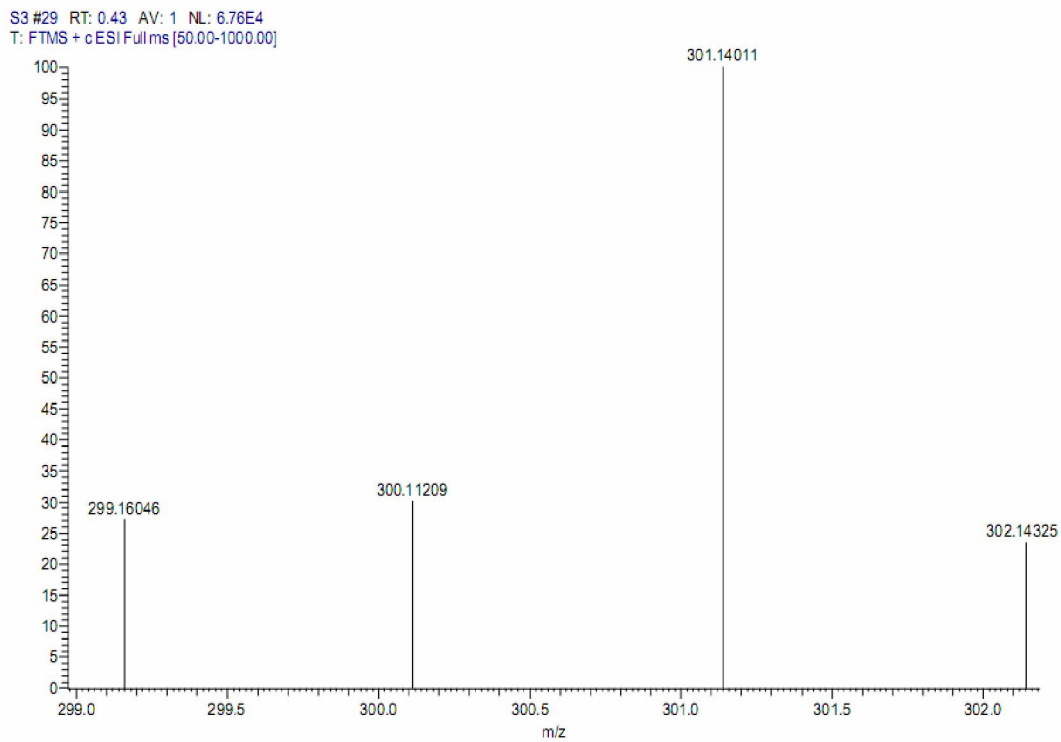

**Figure S20.**  $^1\text{H}$  NMR spectrum of **L3**.

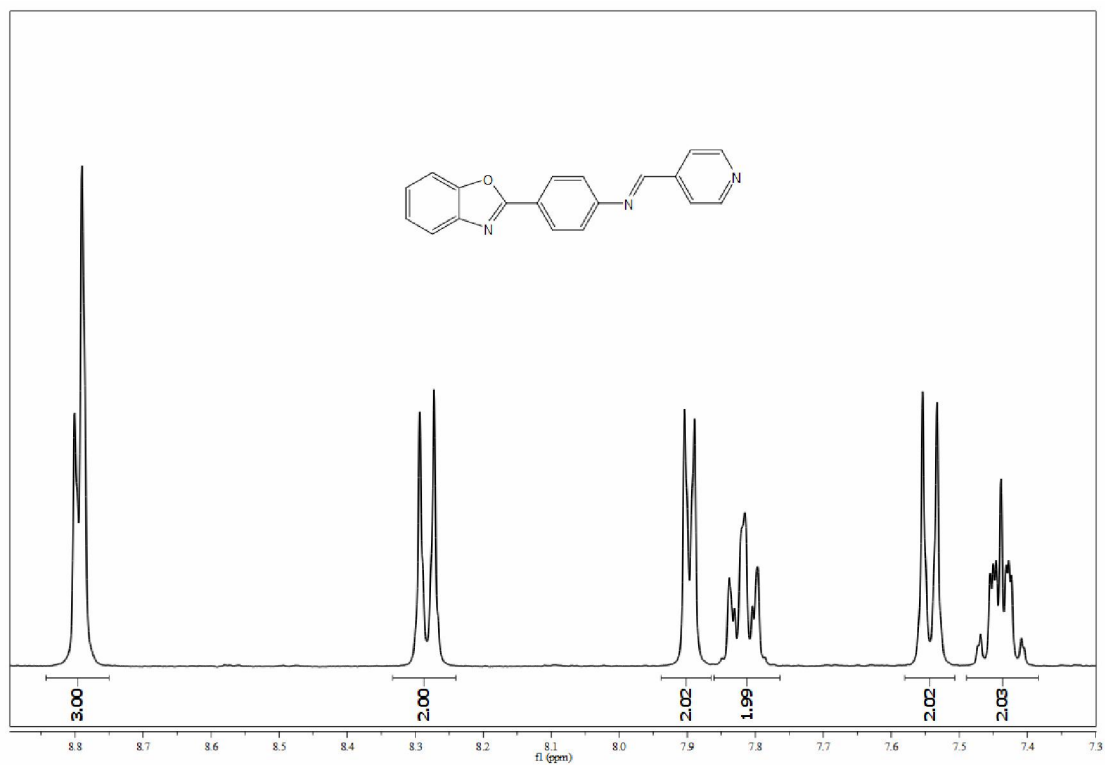

**Figure S21.**  $^{13}\text{C}$  NMR spectrum of **L3**.

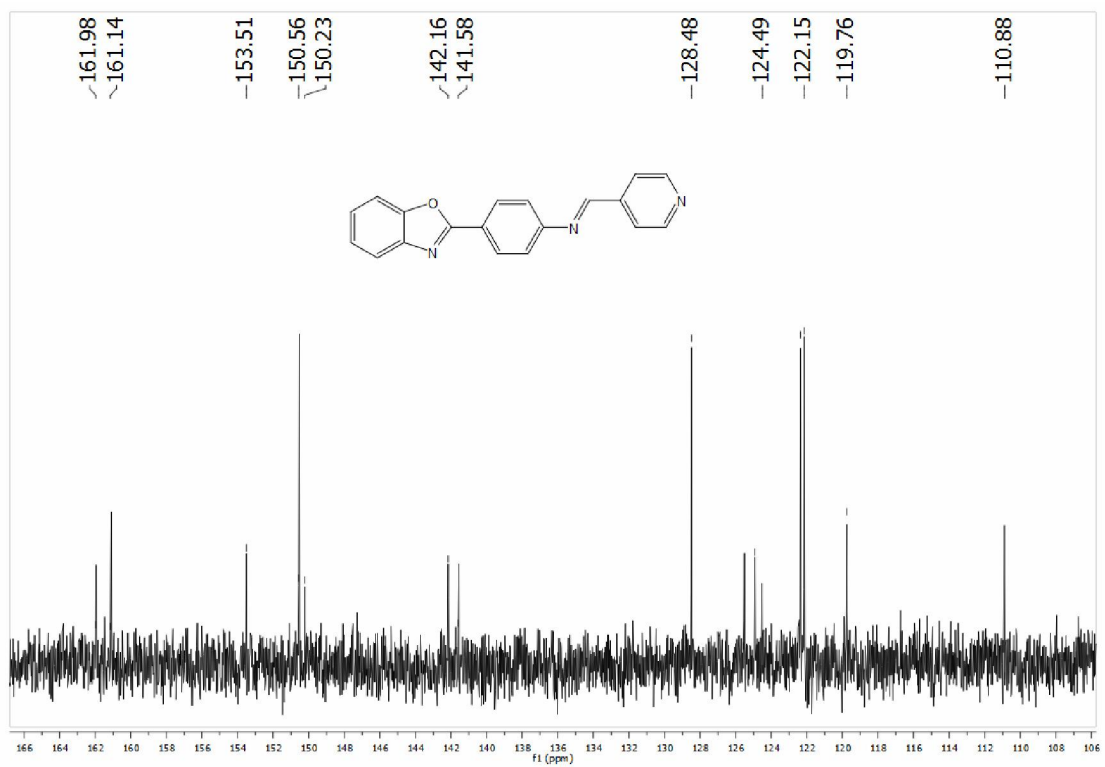

**Figure S22.** MS spectrum of **L3**.

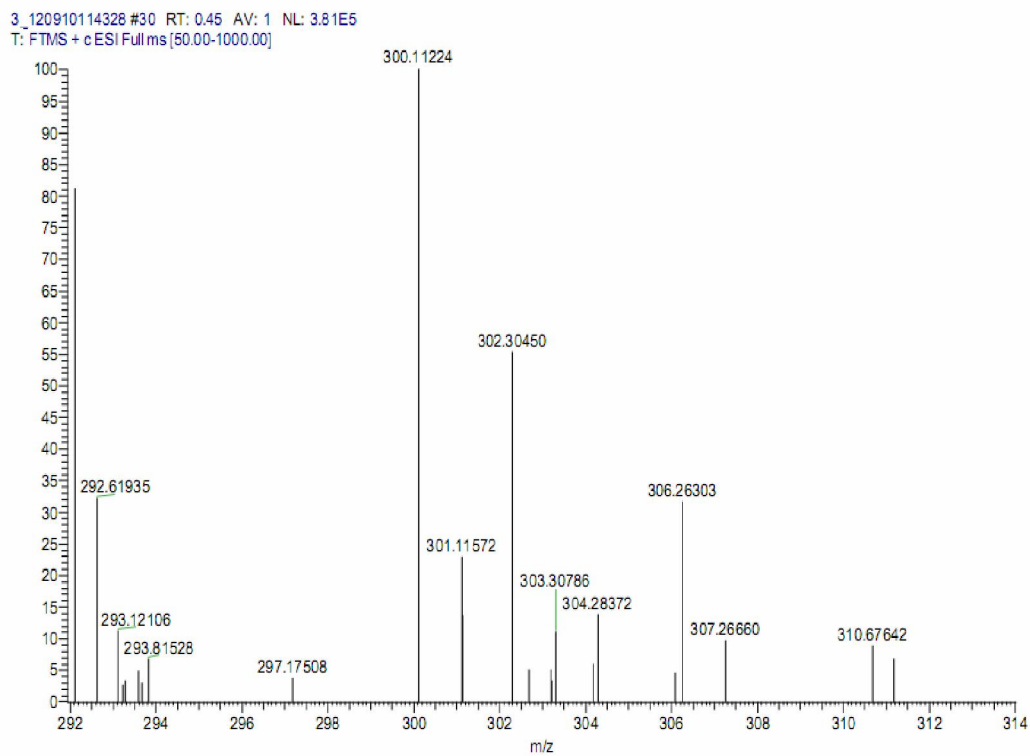

Supplement: c3tc31626b.pdf [file c3tc31626b.pdf]
